# Supplementary material for: PEGylated hybrid ytterbia nanoparticles as high-performance diagnostic probes for in vivo magnetic resonance and X-ray computed tomography imaging with low systemic toxicity
Source: Royal Society of Chemistry journal article supplement (doi:10.1039/c3nr00491k), 2013-01-01
Supplement: c3nr00491k.pdf [file c3nr00491k.pdf]

## Supporting Information for

### **PEGylated Hybrid Ytterbia Nanoparticles as a High-Performance Diagnostic Probe for In Vivo Magnetic Resonance and X-ray Computed Tomography Imaging with Low Systemic Toxicity**

*Zhen Liu,<sup>a, b</sup> Fang Pu,<sup>a</sup> Jianhua Liu,<sup>c</sup> Liyan Jiang,<sup>d</sup> Qinghai Yuan,<sup>c</sup> Zhengqiang  
Li,<sup>d</sup> Jinsong Ren,\*<sup>a</sup> and Xiaogang Qu\*<sup>a</sup>*

<sup>a</sup> State Key Laboratory of Rare Earth Resource Utilization and Laboratory of Chemical Biology,  
Changchun Institute of Applied Chemistry, Chinese Academy of Sciences, Changchun, Jilin  
130022 (P.R. China)

Fax: (+86) 0431-85262625 E-mail: jren@ciac.jl.cn

<sup>b</sup> Graduate School of the Chinese Academy of Sciences, Beijing, 100039 (P.R. China)

<sup>c</sup> Department of Radiology, Second Hospital of Jilin University, Changchun, Jilin, 130041 (P.R.  
China)

<sup>d</sup> College of Life Science, Jilin University, Changchun, Jilin, 130012 (P.R. China)

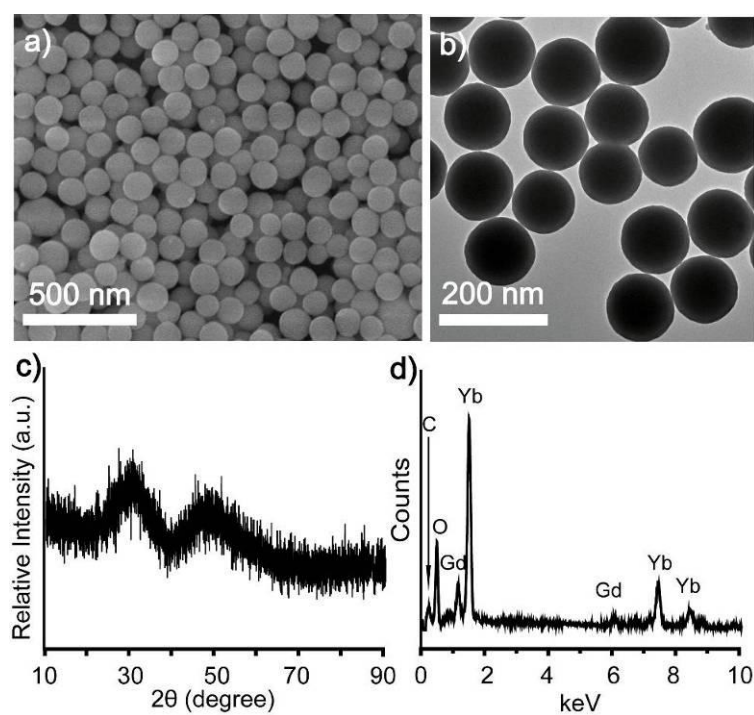

**Figure S1.** SEM image (a), TEM image (b), wide-angle XRD pattern (c), as well as EDS spectrum of the precursor  $\text{Yb(OH)CO}_3\cdot\text{Gd}$  nanoparticles.

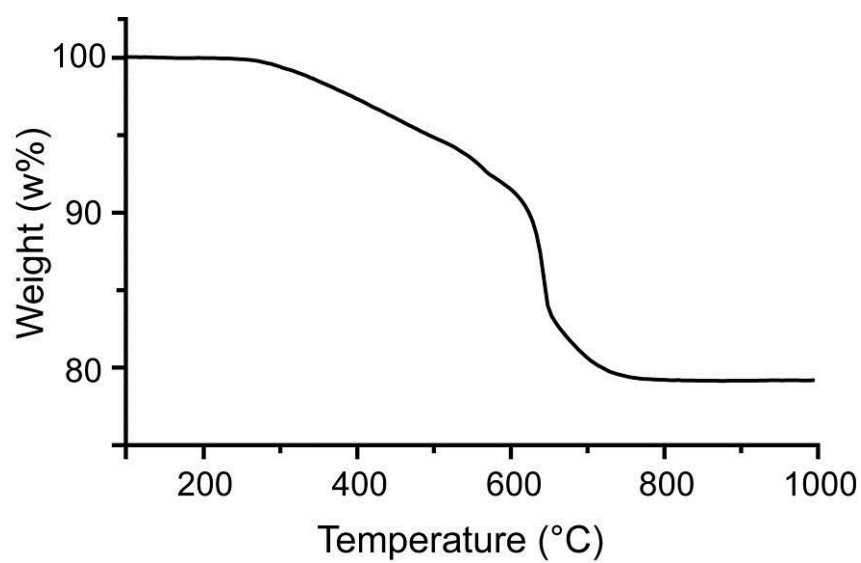

**Figure S2.** Thermogravimetric analysis curve of the precursor Yb(OH)CO<sub>3</sub>:Gd nanoparticles in air.

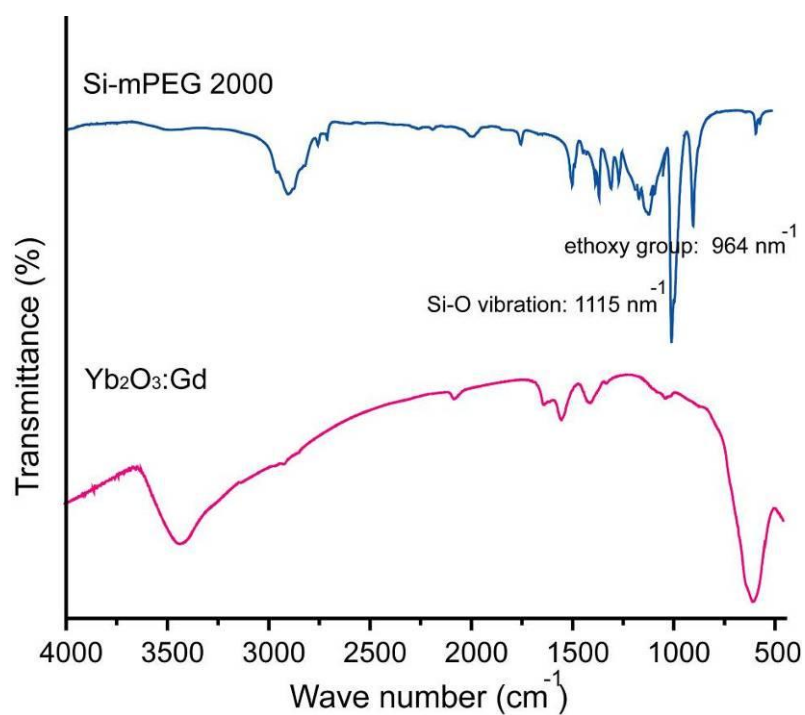

**Figure S3.** FTIR spectra of silanated mPEG and Yb<sub>2</sub>O<sub>3</sub>:Gd nanoparticles.

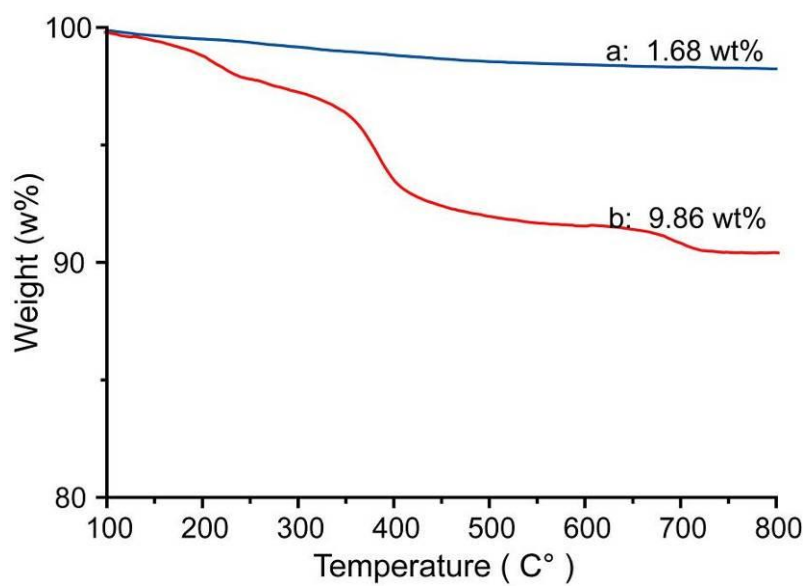

**Figure S4.** Thermogravimetric analysis curves of  $\text{Yb}_2\text{O}_3:\text{Gd}$  nanoparticles (a) and PEG- $\text{Yb}_2\text{O}_3:\text{Gd}$  nanoparticles (b).

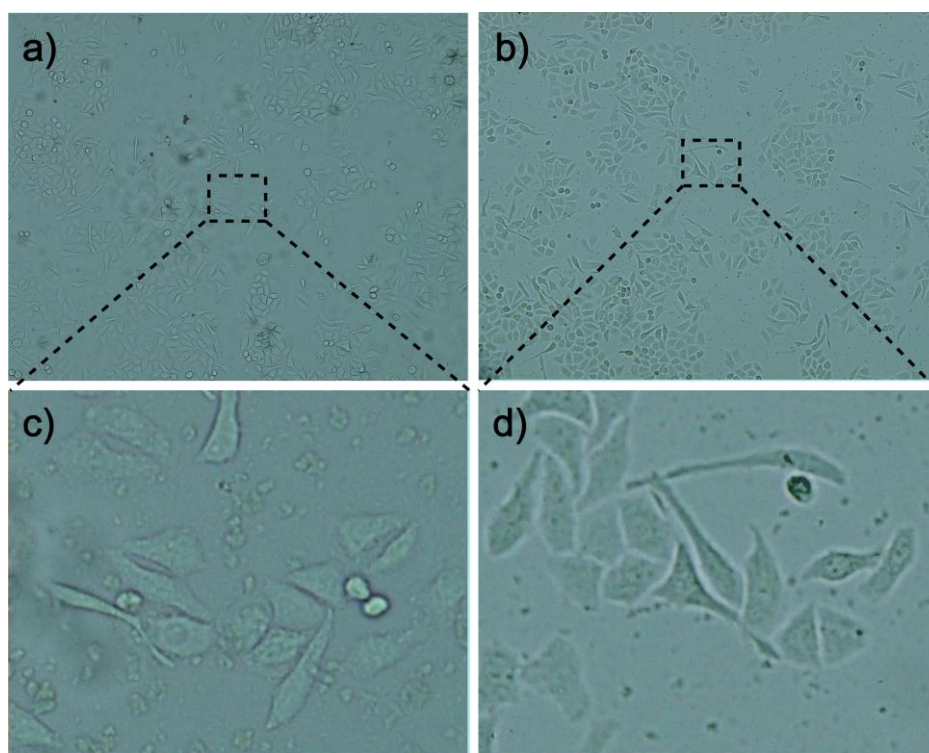

**Figure S5.** Microscopic images of HepG2 cells incubated without (a) and with (b) PEG-Yb<sub>2</sub>O<sub>3</sub>:Gd nanoparticles for 48 h. Amplificatory images: without nanoparticles (c) and with nanoparticles (d).

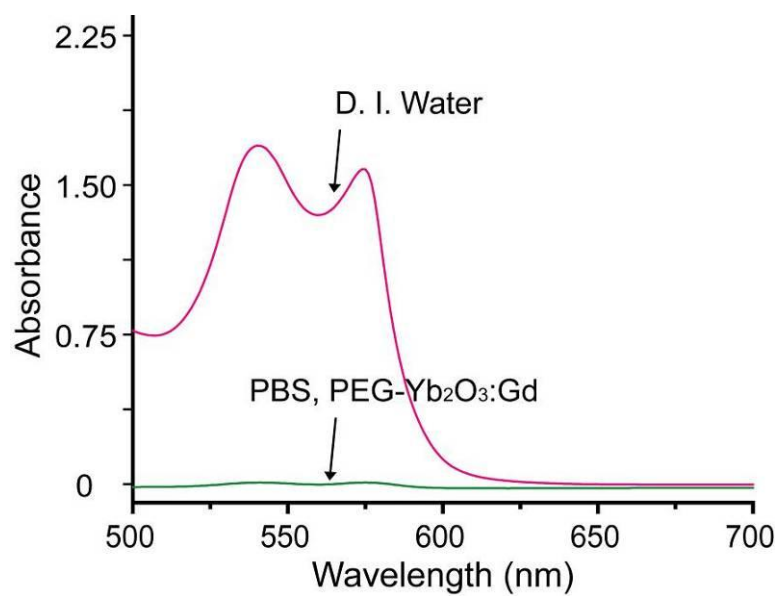

**Figure S6.** UV-vis absorption spectra to detect the presence of hemoglobin in the supernatant of PEG-Yb<sub>2</sub>O<sub>3</sub>:Gd nanoparticles by using D.I. water and PBS as the positive and negative controls, respectively.

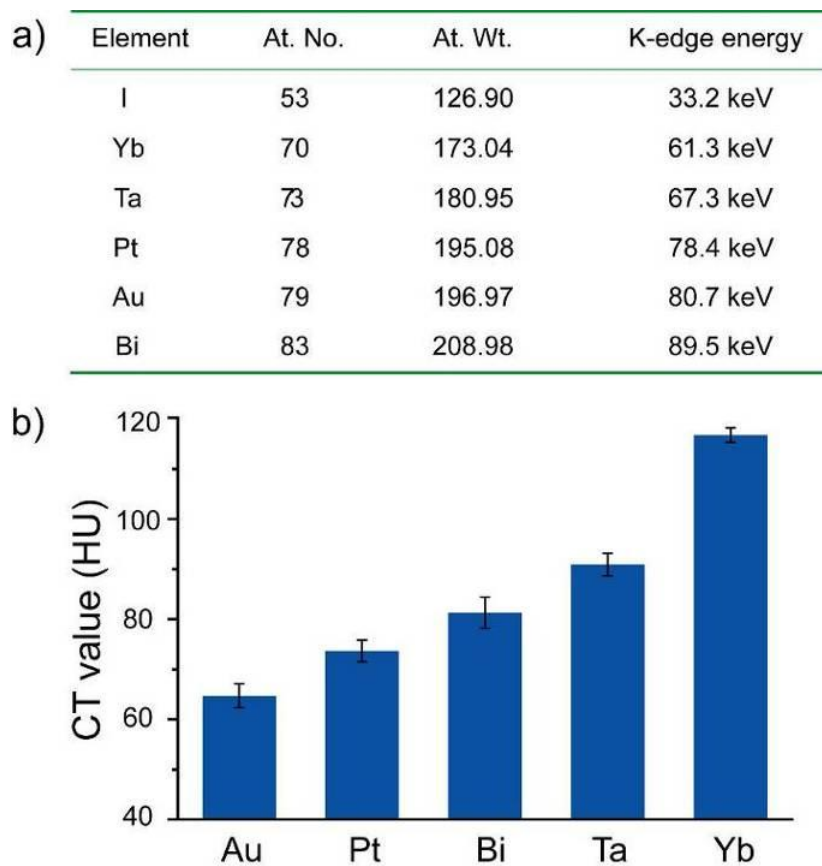

**Figure S7.** Physicochemical characterization of various CT-related elements (a), CT values of different metallic salts dispersed in ethanol with metal concentration of  $10 \text{ mg mL}^{-1}$  at clinical 120 KVp voltage (b).



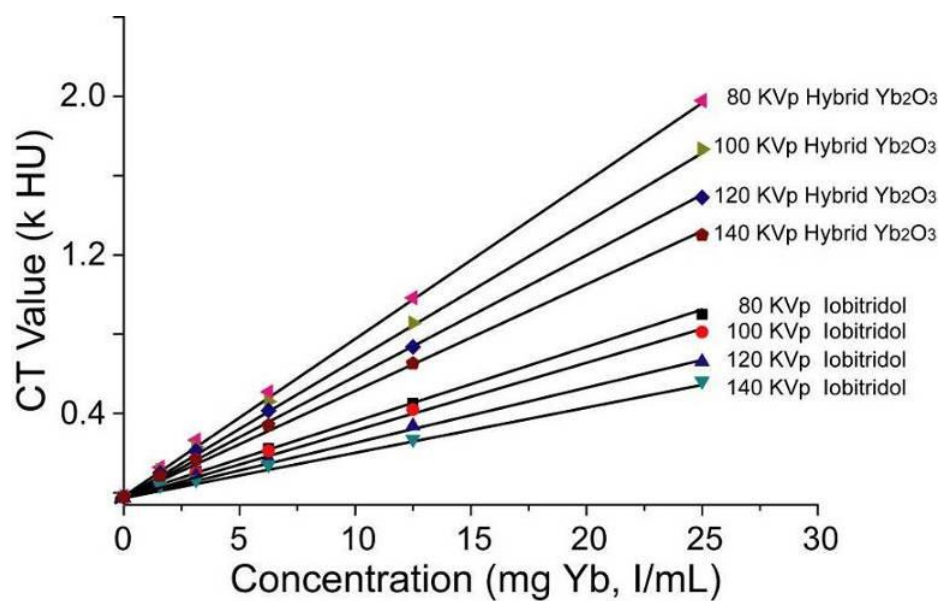

**Figure S8.** CT values of the Iobitridol and PEG-Yb<sub>2</sub>O<sub>3</sub>:Gd nanoparticles with different concentrations determined at various clinical voltages.

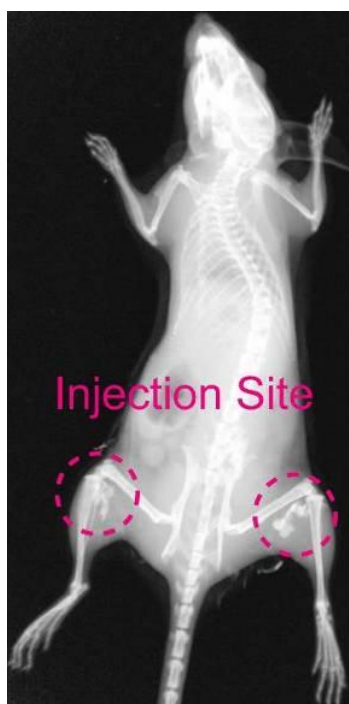

**Figure S9.** X-ray image of nude mouse after subcutaneous injection of PEG-Yb<sub>2</sub>O<sub>3</sub>:Gd nanoparticles.

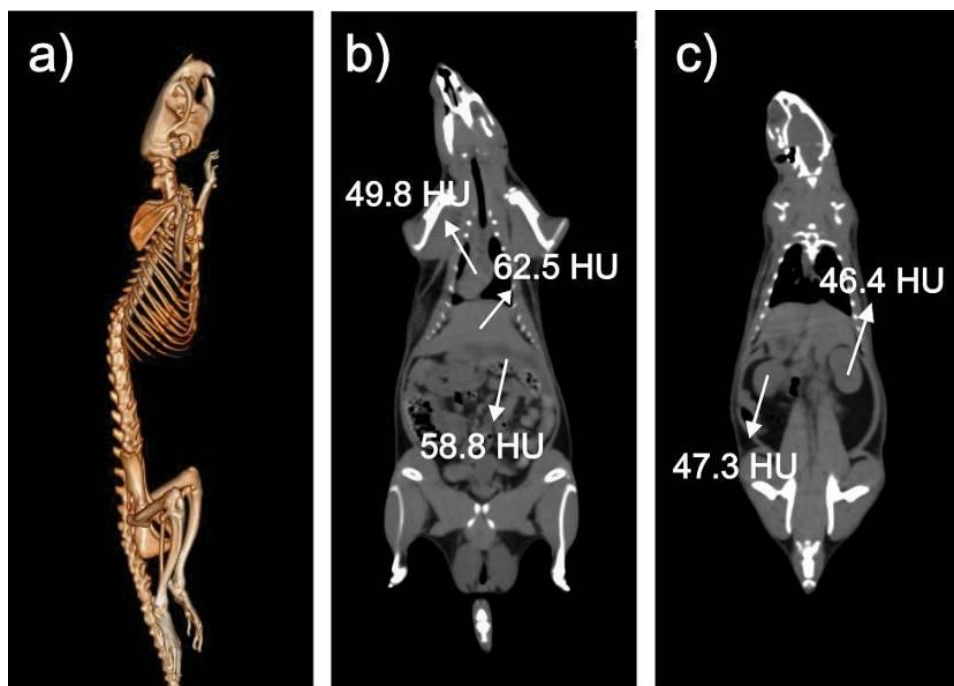

**Figure S10.** In vivo CT 3D-renderings (a) and coronal view images (b, c) of the rat one month after intravenous injection of PEG-Yb<sub>2</sub>O<sub>3</sub>:Gd nanoparticles.

**Table S1.** Exact value of hemolysis percentage upon PEG-Yb<sub>2</sub>O<sub>3</sub>:Gd nanoparticles with different concentrations.

| Concentrations ( mg Yb mL <sup>-1</sup> ) | Value of hemolysis (%) |
|-------------------------------------------|------------------------|
| PBS                                       | 0                      |
| water                                     | 100                    |
| 0.078125                                  | -0.023                 |
| 0.15625                                   | 0.016                  |
| 0.3125                                    | 0.088                  |
| 0.625                                     | -0.102                 |
| 0.125                                     | 0.127                  |
| 0.25                                      | 0.089                  |
| 0.50                                      | 0.142                  |
| 1.00                                      | 0.244                  |

**Table S2.** CT values of the heart, liver, spleen, kidneys, and bladder of a rat before and after intravenous administration of 1 mL of PEG-Yb<sub>2</sub>O<sub>3</sub>:Gd solution (50 mg Yb mL<sup>-1</sup>) at different timed intervals.

| Time          | Heart | Liver | Spleen | Kidneys   | Bladder |
|---------------|-------|-------|--------|-----------|---------|
| Pre-injection | 49.3  | 60.7  | 57.1   | 49.3/48.7 | 50.8    |
| 30 min        | 62.2  | 95.8  | 79.5   | 47.6/49.2 | 51.9    |
| 60 min        | 57.3  | 124.3 | 107.6  | 49.5/47.8 | 49.7    |
| 90 min        | 53.7  | 153.4 | 128.7  | 47.2/48.6 | 50.3    |
| 120 min       | 50.6  | 176.8 | 156.9  | 49.1/48.7 | 49.8    |

**Table S3.** CT values of the heart, liver, spleen, kidneys, and bladder of a rat before and after intravenous administration of 0.3 mL of Iobitridol (350 mg I mL<sup>-1</sup>) at different timed intervals.

| Time          | Heart | Liver | Spleen | Kidneys     | Bladder |
|---------------|-------|-------|--------|-------------|---------|
| Pre-injection | 51.7  | 61.4  | 56.8   | 47.3/48.6   | 51      |
| 5 min         | 49.4  | 62.4  | 55.9   | 457.1/459.8 | 52.4    |
| 15 min        | 50.3  | 59.8  | 57     | 365.7/359.6 | 642.1   |
| 30 min        | 50.3  | 61    | 56.8   | 269.3/273.1 | 843.7   |
| 60 min        | 51.1  | 60.7  | 55.4   | 48.8/48.2   | 521.3   |

**Table S4.** Pathological inflammatory responses of various viscera 30 d after intravenous administration.

| Samples | Grade of<br>Inflammation | Lymphocytes | Macrophages | Neutrophils | Eosinophils |
|---------|--------------------------|-------------|-------------|-------------|-------------|
| Heart   | Low                      | +-          | +-          | +-          | +-          |
| Liver   | Low                      | +           | +           | +           | +-          |
| Spleen  | Low                      | +           | +           | +           | +-          |
| Lung    | Low                      | +-          | +-          | +-          | +-          |
| Kidney  | Low                      | +-          | +-          | +-          | +-          |

**Table S5.** Hematology analysis and blood biochemical assay 30 days after intravenous administration.

| Test                                                | Unit                      | Control group (mean $\pm$ sd) | Treatment group (mean $\pm$ sd) |
|-----------------------------------------------------|---------------------------|-------------------------------|---------------------------------|
| blood cell count (WBC)                              | $\times 10^9/\text{L}$    | $9.1 \pm 2.7$                 | $9.7 \pm 3.2$                   |
| red cell count (RBC)                                | $\times 10^{12}/\text{L}$ | $9.2 \pm 1.3$                 | $9.4 \pm 1.9$                   |
| hemoglobin (HGB)                                    | g/L                       | $158.7 \pm 34.5$              | $168.5 \pm 44.3$                |
| mean corpuscular hemoglobin<br>(MCH)                | pg                        | $17.3 \pm 2.1$                | $16.8 \pm 3.1$                  |
| mean corpuscular hemoglobin<br>concentration (MCHC) | g/L                       | $318 \pm 18.3$                | $324 \pm 23.6$                  |
| alanine aminotransferase<br>(ALT)                   | U/L                       | $44.5 \pm 8.5$                | $47.3 \pm 9.8$                  |
| aspartate aminotransferase<br>(AST)                 | U/L                       | $160.4 \pm 32.5$              | $175.3 \pm 42.1$                |
| blood urea nitrogen (BUN)                           | $\times 10^6/\mu\text{L}$ | $8.6 \pm 1.9$                 | $9.1 \pm 2.3$                   |
| plasma creatinine (CRE)                             | $\times 10^3/\mu\text{L}$ | $22.8 \pm 3.1$                | $29.6 \pm 4.7$                  |
